# Supplementary material for: LIN-3/EGF Promotes the Programmed Cell Death of Specific Cells in Caenorhabditis elegans by Transcriptional Activation of the Pro-apoptotic Gene egl-1
Source: PubMed Central journal article supplement (PMC4140636; doi:10.1371/journal.pgen.1004513), 2014-08-21
Supplement: pgen.1004513.s003.pdf [file pgen.1004513.s003.pdf]

| <b>Table S1. Analysis of extra surviving cells in the pharyngeal region in the <i>ced-3(n2427)</i> sensitized background.</b> |                                                     |                |                |                |                |                |                |                |                     |                     |                |                 |
|-------------------------------------------------------------------------------------------------------------------------------|-----------------------------------------------------|----------------|----------------|----------------|----------------|----------------|----------------|----------------|---------------------|---------------------|----------------|-----------------|
| Genotype                                                                                                                      | % of extra surviving cells in the pharyngeal region |                |                |                |                |                |                |                |                     |                     |                |                 |
|                                                                                                                               | % g1<br>sister                                      | % l1<br>sister | % M1<br>sister | % m7<br>sister | % M4<br>sister | % g2<br>sister | % m1<br>sister | % MC<br>sister | % l2<br>aunt/sister | % e1<br>aunt/sister | % m2<br>sister | % NSM<br>sister |
| <i>ced-3</i>                                                                                                                  | 10                                                  | 10             | 30             | 15             | 5              | 55             | 20             | 15             | 10                  | 0                   | 15             | 0               |
| <i>lin-3 ced-3</i>                                                                                                            | 35                                                  | 40             | 60             | 35             | 15             | 70             | 35             | 35             | 10                  | 0                   | 20             | 5               |
| <i>let-23; lin-3</i>                                                                                                          | 40                                                  | 40             | 70             | 20             | 10             | 70             | 40             | 20             | 15                  | 5                   | 10             | 0               |

Extra surviving cells were counted in the anterior and posterior pharynx of L4 hermaphrodites using Nomarski optics (n=20).  
Alleles used: *lin-3(e1417)*, *let-23(n1045)*, and *ced-3(n717)*.
