# Supplementary material for: LIN-3/EGF Promotes the Programmed Cell Death of Specific Cells in Caenorhabditis elegans by Transcriptional Activation of the Pro-apoptotic Gene egl-1
Source: PubMed Central journal article supplement (PMC4140636; doi:10.1371/journal.pgen.1004513), 2014-08-21
Supplement: pgen.1004513.s004.pdf [file pgen.1004513.s004.pdf]

**Table S2. *lin-3* requires *let-23* and the core PCD pathway to increase numbers of embryonic cell corpses.**

| Genotype                        | Number of embryonic cell corpses <sup>a</sup> |                          |                         |           |           |
|---------------------------------|-----------------------------------------------|--------------------------|-------------------------|-----------|-----------|
|                                 | Comma                                         | 1.5-fold                 | 2-fold                  | 3-fold    | 4-fold    |
| Wild-type                       | 10.0 ± 1.6                                    | 11.4 ± 1.5               | 10.0 ± 1.9              | 2.1 ± 1.7 | 0.5 ± 0.7 |
| <i>syls1</i>                    | 12.4 ± 2.4**                                  | 13.2 ± 2.2**             | 13.1 ± 2.1**            | 2.5 ± 1.8 | 0.5 ± 0.6 |
| <i>let-23(n1045); syls1</i>     | 9.9 ± 2.4 <sup>††</sup>                       | 10.8 ± 1.9 <sup>††</sup> | 9.3 ± 2.6 <sup>††</sup> | 2.2 ± 1.5 | 0.6 ± 0.6 |
| <i>egl-1(n1084n3082)</i>        | 0.1 ± 0.3                                     | 0.1 ± 0.3                | 0.1 ± 0.3               | 0.0 ± 0.0 | 0.0 ± 0.2 |
| <i>egl-1(n1084n3082); syls1</i> | 0.1 ± 0.3                                     | 0.0 ± 0.0                | 0.0 ± 0.0               | 0.0 ± 0.0 | 0.0 ± 0.2 |
| <i>ced-9(n1950)</i>             | 0.1 ± 0.3                                     | 0.4 ± 0.5                | 1.2 ± 1.1               | 0.5 ± 0.6 | 0.4 ± 0.6 |
| <i>ced-9(n1950); syls1</i>      | 0.3 ± 0.5                                     | 0.4 ± 0.6                | 0.8 ± 0.8               | 0.7 ± 0.7 | 0.7 ± 0.7 |
| <i>ced-4(n1162)</i>             | 0.1 ± 0.3                                     | 0.1 ± 0.3                | 0.0 ± 0.0               | 0.0 ± 0.0 | 0.0 ± 0.0 |
| <i>ced-4(n1162); syls1</i>      | 0.1 ± 0.3                                     | 0.1 ± 0.3                | 0.0 ± 0.0               | 0.0 ± 0.0 | 0.0 ± 0.0 |
| <i>ced-3(n717)</i>              | 0.1 ± 0.3                                     | 0.1 ± 0.3                | 0.1 ± 0.3               | 0.0 ± 0.0 | 0.0 ± 0.0 |
| <i>ced-3(n717); syls1</i>       | 0.1 ± 0.3                                     | 0.1 ± 0.3                | 0.1 ± 0.3               | 0.0 ± 0.0 | 0.0 ± 0.0 |

<sup>a</sup>Cell corpses scored at the indicated developmental stages are presented as the mean ± SD. (n≥30). *syls1* is a chromosomal integrant of a repetitive *lin-3* transgene. *syls1* was compared to wild-type (\**P*<0.05 and \*\**P*<0.001, two-tailed *t* test) and *let-23(n1045); syls1[lin-3(+)]* were compared to *syls1[lin-3(+)]* (<sup>†</sup>*P*<0.05 and <sup>††</sup>*P*<0.001, two-tailed *t* test).
