# Supplementary material for: LIN-3/EGF Promotes the Programmed Cell Death of Specific Cells in Caenorhabditis elegans by Transcriptional Activation of the Pro-apoptotic Gene egl-1
Source: PubMed Central journal article supplement (PMC4140636; doi:10.1371/journal.pgen.1004513), 2014-08-21
Supplement: pgen.1004513.s005.pdf [file pgen.1004513.s005.pdf]

**Table S3. Mutants defective in the LET-60-MPK-1 pathway have reduced numbers of cell corpses.**

| Genotype                                  | Number of cell corpses <sup>a</sup> |             |             |           |           |
|-------------------------------------------|-------------------------------------|-------------|-------------|-----------|-----------|
|                                           | Comma                               | 1.5-fold    | 2-fold      | 3-fold    | 4-fold    |
| Wild-type (at 20°C)                       | 10.0 ± 1.6                          | 11.4 ± 1.5  | 10.0 ± 1.9  | 2.1 ± 1.7 | 0.5 ± 0.7 |
| Wild-type (at 25°C)                       | 10.1 ± 2.5                          | 11.1 ± 2.1  | 10.0 ± 1.9  | 2.2 ± 1.9 | 0.5 ± 0.7 |
| <i>let-60(n1046gf)</i>                    | 9.5 ± 2.3                           | 10.7 ± 3.1  | 9.7 ± 2.4   | 2.0 ± 1.7 | 0.6 ± 0.7 |
| <i>unc-32(e189)</i>                       | 9.7 ± 1.6                           | 10.9 ± 1.8  | 9.8 ± 2.0   | 1.7 ± 1.5 | 0.5 ± 0.7 |
| <i>unc-79(e1068)</i>                      | 9.3 ± 2.2                           | 11.3 ± 1.7  | 10.0 ± 2.1  | 2.5 ± 1.5 | 0.5 ± 0.7 |
| <i>sem-5(n1779)</i>                       | 7.6 ± 1.6**                         | 9.5 ± 1.5** | 6.3 ± 2.3** | 1.5 ± 1.4 | 0.3 ± 0.5 |
| <i>sos-1(cs41)</i> (at 25°C) <sup>b</sup> | 7.7 ± 2.7**                         | 10.9 ± 3.5  | 8.9 ± 2.8   | 2.0 ± 1.7 | 0.3 ± 0.5 |
| <i>let-60(sy93)</i>                       | 6.5 ± 3.0**                         | 8.5 ± 2.4** | 6.2 ± 3.3** | 2.3 ± 1.7 | 0.4 ± 0.7 |
| <i>lin-45(n2506)</i> <sup>c</sup>         | 6.7 ± 2.6**                         | 8.2 ± 2.0** | 6.3 ± 3.4** | 1.5 ± 1.6 | 0.4 ± 0.6 |
| <i>mek-2(ku114)</i> <sup>c</sup>          | 7.1 ± 2.6**                         | 7.9 ± 2.6** | 5.6 ± 3.0** | 1.7 ± 1.6 | 0.5 ± 0.8 |
| <i>mpk-1(ku1)</i> <sup>d</sup>            | 7.7 ± 2.5**                         | 9.0 ± 1.1** | 6.5 ± 2.5** | 2.2 ± 1.7 | 0.4 ± 0.6 |
| <i>mpk-1(n2521)</i> <sup>e</sup>          | 6.9 ± 2.3**                         | 8.0 ± 2.4** | 5.9 ± 2.2** | 1.9 ± 1.5 | 0.5 ± 0.7 |
| <i>mpk-1(n2521)</i> <sup>c</sup>          | 7.3 ± 2.3**                         | 8.4 ± 2.0** | 7.0 ± 3.5** | 2.4 ± 2.0 | 0.5 ± 0.9 |
| Control RNAi                              | 9.2 ± 2.9                           | 10.2 ± 3.7  | 9.7 ± 1.8   | 2.1 ± 1.8 | 0.5 ± 0.7 |
| <i>let-60</i> RNAi                        | 7.3 ± 1.8*                          | 8.5 ± 2.2*  | 6.4 ± 3.0** | 1.8 ± 2.0 | 0.4 ± 0.6 |

<sup>a</sup>Cell corpses scored at the indicated developmental stages are presented as the mean ± SD. (n≥30). The *rrf-3(pk1426)* mutant was used to enhance the RNAi effect in RNAi experiments. Mutants embryos were compared to wild-type, and *let-60* RNAi treatment was compared to control RNAi treatment (\**P*<0.05 and \*\**P*<0.001, two-tailed *t* test). <sup>b</sup>*sos-1(cs41)* is temperature-sensitive and its cell corpse profile was scored at 25°C. <sup>c</sup>Mutants also contain *let-60(n1046gf)*. <sup>d</sup>Mutants also contain *unc-32(e189)*. <sup>e</sup>Mutants also contain *unc-79(e1068)*.
