# Supplementary material for: LIN-3/EGF Promotes the Programmed Cell Death of Specific Cells in Caenorhabditis elegans by Transcriptional Activation of the Pro-apoptotic Gene egl-1
Source: PubMed Central journal article supplement (PMC4140636; doi:10.1371/journal.pgen.1004513), 2014-08-21
Supplement: pgen.1004513.s006.pdf [file pgen.1004513.s006.pdf]

**Table S4. The PI3K pathway and PLC genes are not involved in embryonic PCD.****A. Mutants defective in the PI3K pathway have normal numbers of cell corpses.**

| Genotype                                                   | Number of cell corpses <sup>a</sup> |            |            |           |           |
|------------------------------------------------------------|-------------------------------------|------------|------------|-----------|-----------|
|                                                            | Comma                               | 1.5-fold   | 2-fold     | 3-fold    | 4-fold    |
| Wild type (at 20°C)                                        | 10.0 ± 1.6                          | 11.4 ± 1.5 | 10.0 ± 1.9 | 2.1 ± 1.7 | 0.5 ± 0.7 |
| Wild type (at 25°C)                                        | 10.1 ± 2.5                          | 11.1 ± 2.1 | 10.0 ± 1.9 | 2.2 ± 1.9 | 0.5 ± 0.7 |
| <i>aap-1(ok282)</i>                                        | 10.3 ± 1.4                          | 11.8 ± 2.0 | 10.6 ± 1.6 | 2.3 ± 1.2 | 0.6 ± 0.7 |
| <i>aap-1(m889)</i>                                         | 10.3 ± 1.8                          | 11.4 ± 1.9 | 10.5 ± 1.9 | 2.5 ± 1.3 | 0.7 ± 0.6 |
| <i>age-2(yw23); age-1(hx546)</i><br>(at 25°C) <sup>b</sup> | 10.4 ± 1.9                          | 11.2 ± 1.0 | 10.5 ± 1.6 | 2.9 ± 1.1 | 0.5 ± 0.6 |
| <i>daf-16(m26); age-1(m333)</i>                            | 10.1 ± 2.2                          | 11.1 ± 1.6 | 10.0 ± 1.7 | 2.1 ± 1.0 | 0.5 ± 0.6 |

**B. Mutants defective in PLC genes have normal numbers of cell corpses.**

| Genotype                          | Number of cell corpses <sup>a</sup> |            |            |           |           |
|-----------------------------------|-------------------------------------|------------|------------|-----------|-----------|
|                                   | Comma                               | 1.5-fold   | 2-fold     | 3-fold    | 4-fold    |
| <i>plc-1(rx1)</i> <sup>c</sup>    | 10.5 ± 1.3                          | 11.0 ± 2.3 | 10.5 ± 2.3 | 2.5 ± 2.0 | 0.7 ± 0.8 |
| <i>plc-2(ok1761)</i>              | 10.0 ± 2.4                          | 10.8 ± 1.9 | 10.5 ± 2.8 | 2.0 ± 1.1 | 0.6 ± 0.7 |
| <i>plc-3(tm1340)</i> <sup>d</sup> | 10.4 ± 2.0                          | 11.7 ± 1.9 | 10.9 ± 1.9 | 2.7 ± 1.6 | 0.5 ± 0.6 |
| <i>plc-4(ok1215)</i>              | 10.6 ± 1.8                          | 11.9 ± 2.6 | 10.5 ± 1.6 | 2.3 ± 1.6 | 0.7 ± 0.7 |

<sup>a</sup>Cell corpses scored at the indicated developmental stages are presented as the mean ± SD (n≥30).

<sup>b</sup>The *age-2(yw23); age-1(hx546)* strain is temperature-sensitive and its cell corpse profile was scored at 25°C.

<sup>c</sup>GFP-negative progeny of *plc-1(rx1); kEx2[plc-1(+); sur-5::gfp]* adult worms.

<sup>d</sup>GFP-negative progeny of *plc-3(tm1340)/mln1[mls14 dpy-10(e128)]* adult worms.
