# Supplementary material for: LIN-3/EGF Promotes the Programmed Cell Death of Specific Cells in Caenorhabditis elegans by Transcriptional Activation of the Pro-apoptotic Gene egl-1
Source: PubMed Central journal article supplement (PMC4140636; doi:10.1371/journal.pgen.1004513), 2014-08-21
Supplement: pgen.1004513.s007.pdf [file pgen.1004513.s007.pdf]

**Table S5. *lin-1* mutants, but not *lin-31* mutants, have reduced numbers of cell corpses.**

| Genotype                         | Number of cell corpses <sup>a</sup> |             |             |           |           |
|----------------------------------|-------------------------------------|-------------|-------------|-----------|-----------|
|                                  | Comma                               | 1.5-fold    | 2-fold      | 3-fold    | 4-fold    |
| Wild-type                        | 10.0 ± 1.6                          | 11.4 ± 1.5  | 10.0 ± 1.9  | 2.1 ± 1.7 | 0.5 ± 0.7 |
| <i>lin-3(e1417)</i>              | 6.8 ± 2.0**                         | 8.8 ± 2.3** | 6.3 ± 2.4** | 1.5 ± 1.8 | 0.2 ± 0.6 |
| <i>lin-1(sy254)</i>              | 6.7 ± 2.6**                         | 8.9 ± 2.0** | 6.3 ± 2.3** | 1.5 ± 1.6 | 0.3 ± 0.6 |
| <i>lin-1(n1047)</i>              | 6.7 ± 1.7**                         | 9.0 ± 3.0** | 6.7 ± 2.3** | 1.5 ± 1.3 | 0.5 ± 0.6 |
| <i>lin-1(n303)</i>               | 7.7 ± 1.8**                         | 8.5 ± 2.2** | 7.0 ± 2.5** | 1.8 ± 1.7 | 0.4 ± 0.7 |
| <i>lin-1(n1761)</i>              | 8.0 ± 2.4**                         | 8.4 ± 2.5** | 5.8 ± 2.8** | 1.6 ± 2.0 | 0.3 ± 0.5 |
| <i>lin-31(n301)</i>              | 9.6 ± 2.4                           | 10.8 ± 3.3  | 10.2 ± 2.7  | 2.3 ± 1.9 | 0.5 ± 0.7 |
| <i>lin-31(n1053)</i>             | 10.4 ± 1.6                          | 11.4 ± 2.3  | 10.7 ± 2.1  | 2.3 ± 1.3 | 0.7 ± 0.7 |
| <i>lin-31(gk569)</i>             | 10.1 ± 1.9                          | 11.5 ± 2.4  | 10.6 ± 2.4  | 2.0 ± 1.8 | 0.7 ± 0.8 |
| <i>lin-1(sy254) lin-3(e1417)</i> | 7.2 ± 1.5**                         | 9.3 ± 1.4** | 7.1 ± 1.3** | 2.3 ± 1.8 | 0.4 ± 0.6 |

<sup>a</sup>Cell corpses scored at the indicated developmental stages are presented as the mean ± SD. (n≥30). Mutant embryos were compared to wild-type (\**P*<0.05 and \*\**P*<0.001, two-tailed *t* test). The cell corpse numbers of *lin-1(sy254) lin-3(e1417)* double mutants showed no significant difference when compared to the *lin-1(sy254)* or *lin-3(e1417)* single mutant (*P*>0.05, two-tailed *t* test).
